# Supplementary material for: Rolling Circle cDNA Synthesis Uncovers Circular RNA Splice Variants
Source: Int J Mol Sci. 2019 Aug 16;20(16):3988. doi: 10.3390/ijms20163988 (PMC6721031; doi:10.3390/ijms20163988)
Supplement: Supplementary file 1 [file ijms-20-03988-s001.zip › Das et al. Supplimentary files/Supplementary Table S1. Sequences of the DNA primers used to in this study.xlsx]

## Sheet: Sheet1
Supplementary Table S1. Sequences of the DNA primers used to in this study.
Oligo name	(5′–3′) sequences
18S rRNA-F	AAACGGCTACCACATCCAAG
18S rRNA-R	CCTCCAATGGATCCTCGTTA
ACTB-F	CATGTACGTTGCTATCCAGGC
ACTB-R	CTCCTTAATGTCACGCACGAT
hsa_circ_0001821-div-F	CGACTCTTCCTGGTGAAGCATCTGAT
hsa_circ_0001821-div-R	TACTTGAACGAAGCTCCATGCAGC
hsa_circ_0001566_div-F	CATGGAGCTGGATCATGAAA
hsa_circ_0001566_div-R	ATGCAGCGTCCTGCAATATC
hsa_circ_0001566_fl-F	AATTCATAGAGGATCTGAAA
hsa_circ_0001566_fl-R	ATACCAGCTGAATGCAGATG
hsa_circ_0071410-div-F	CAGGAGCGATTCTTCAGACC
hsa_circ_0071410-div-R	GCATCCTTTGTGCCTTGAAT
hsa_circ_0071410_fl-F	GGACTGCAAAAGGATTTCCA
hsa_circ_0071410_fl-R	ATTCTGCAGAGTTTTCCTTC
hsa_circ_0003359-div-F	ACTCTTCTGCAGCCAAGGAA
hsa_circ_0003359-div-R	CAGCTCTCTCAGCTGCTCCT
hsa_circ_0007127-div-F	TTTGTAGAGGGGGTCGACAG
hsa_circ_0007127-div-R	CCGGAGGCAATCAAATAGAA
hsa_circ_0007127_fl-F	AGAAAAAGATAGGGAGACGT
hsa_circ_0007127_fl-R	GACCGATGTGGAAACATAGA
hsa_circ_0007822-div-F	CTATGGCTGTGGTCAGCAAA
hsa_circ_0007822-div-R	TCCTTCTCTGCTTTGGCATT
hsa_circ_0007822_fl-F	CGGACAAGCTGTAGAGTACA
hsa_circ_0007822_fl-R	TTGGCTTCATAAAGTGGGCA
hsa_circ_0007700-div-F	GGAGAAATCAAGCACTGTTCC
hsa_circ_0007700-div-R	TCTAAGAGAGAGCGCCTTGC
hsa_circ_0003964-div-F	TTCCAAGACTCGGACACTGA
hsa_circ_0003964-div-R	TTTCAGCAAAAGAGGGCCTA
hsa_circ_0003964_fl-F	TTAGCACCAGGCTGGAAGTG
hsa_circ_0003964_fl-R	ACTGGAAGCAGAATTTTCTG
hsa_circ_0084615-div-F	TCAGAGGTGCTTCAAGGAAAA
hsa_circ_0084615-div-R	GCCTTTCCTCCCATTCTTGT
hsa_circ_0084615_fl-F	GTTTTATTAGAGACAAAGCA
hsa_circ_0084615_fl-R	TTTGGCATCATCCACATCAA
hsa_circ_0009156-div-F	TCGAAAATGTGTGTGAATTGG
hsa_circ_0009156-div-R	CAAACTTCCACCCTCCAAGA
hsa_circ_0009156_fl-F	TATGGATAAGCCAGAAGAAA
hsa_circ_0009156_fl-R	TGGAAGATCAAATCCAATTC
