# Supplementary material for: Rolling Circle cDNA Synthesis Uncovers Circular RNA Splice Variants
Source: Int J Mol Sci. 2019 Aug 16;20(16):3988. doi: 10.3390/ijms20163988 (PMC6721031; doi:10.3390/ijms20163988)
Supplement: Supplementary file 1 [file ijms-20-03988-s001.zip › Das et al. Supplimentary files/Supporting Table S2. Gene Ontology analysis.xlsx]

## Sheet: Sheet1
Supporting Table S2. Gene Ontology analysis for target genes of miRNAs associated with has_circ_007127 sequence reported in circBase and circRNA splice variants.
GO Annotation (Biological process)	p-value (circBase)	p-value (Long_splice variant)	p-value (Short_splice variant)	[-log10(Pvalue_circBase)]	[-log10(Pvalue_Long splice variant)]	[-log10(Pvalue_Short splice variant)]
GO:0010575_positive regulation of vascular endothelial growth factor production	0.0001	-	-	4	-	-
GO:0006309_apoptotic DNA fragmentation	0.0004	-	-	3.39794	-	-
GO:0010039_response to iron ion	0.0007	-	-	3.1549	-	-
GO:0000387_spliceosomal snRNP assembly	0.001	0.0001	0.0013	3	4	2.88606
GO:0070830_bicellular tight junction assembly	0.0013	0.0002	-	2.88606	3.69897	-
GO:0006470_protein dephosphorylation	0.0027	0.0005	-	2.56864	3.30103	-
GO:0075733_intracellular transport of virus	0.004	-	-	2.39794	-	-
GO:0042542_response to hydrogen peroxide	0.0048	0.0045	-	2.31876	2.34679	-
GO:0070059_intrinsic apoptotic signaling pathway in response to endoplasmic reticulum stress	0.0081	0.0018	-	2.09151	2.74473	-
GO:0017148_negative regulation of translation	0.0079	0.0011	-	2.10237	2.95861	-
GO:0071407_cellular response to organic cyclic compound	0.0058	-	-	2.23657	-	-
GO:0031648_protein destabilization	0.0048	-	-	2.31876	-	-
GO:0034097_response to cytokine	0.0074	0.0013	-	2.13077	2.88606	-
GO:0001666_response to hypoxia	0.0084	0.2909	-	2.07572	0.536256	-
GO:0034080_CENP-A containing nucleosome assembly	0.0053	-	-	2.27572	-	-
GO:0042787_protein ubiquitination involved in ubiquitin-dependent protein catabolic process	0.0064	0.2781	-	2.19382	0.555799	-
GO:0046777_protein autophosphorylation	0.0112	0.0038	-	1.95078	2.42022	-
GO:0036498_IRE1-mediated unfolded protein response	0.0135	0.0025	-	1.86967	2.60206	-
GO:0032922_circadian regulation of gene expression	0.0135	-	-	1.86967	-	-
GO:0008334_histone mRNA metabolic process	0.0163	0.0038	0.0001	1.78781	2.42022	4
GO:0032259_methylation	0.0176	-	-	1.75449	-	-
GO:1903955_positive regulation of protein targeting to mitochondrion	0.0184	-	-	1.73518	-	-
GO:0016311_dephosphorylation	0.0197	-	-	1.70553	-	-
GO:0071456_cellular response to hypoxia	0.0239	-	-	1.6216	-	-
GO:0002755_MyD88-dependent toll-like receptor signaling pathway	0.0252	-	-	1.5986	-	-
GO:0009636_response to toxic substance	0.0275	-	-	1.56067	-	-
GO:0043401_steroid hormone mediated signaling pathway	0.027	-	-	1.56864	-	-
GO:0008285_negative regulation of cell proliferation	0.0289	0.0128	0.0692	1.5391	1.89279	1.15989
GO:0006486_protein glycosylation	0.0331	-	-	1.48017	-	-
GO:0007049_cell cycle	0.0325	0.0111	0.0653	1.48812	1.95468	1.18509
GO:0006357_regulation of transcription from RNA polymerase II promoter	0.0443	0.285	-	1.3536	0.545155	-
GO:0032201_telomere maintenance via semi-conservative replication	0.0421	0.0089	-	1.37572	2.05061	-
GO:0030148_sphingolipid biosynthetic process	0.0436	-	-	1.36051	-	-
GO:0030324_lung development	0.0402	0.03	-	1.39577	1.52288	-
GO:0016310_phosphorylation	0.0427	-	-	1.36957	-	-
GO:0051726_regulation of cell cycle	0.0427	0.0245	-	1.36957	1.61083	-
GO:0006260_DNA replication	0.0567	0.0282	-	1.24642	1.54975	-
GO:0010212_response to ionizing radiation	0.0593	-	-	1.22695	-	-
GO:0007030_Golgi organization	0.0598	0.0133	-	1.2233	1.87615	-
GO:0031295_T cell costimulation	0.0598	0.0433	-	1.2233	1.36351	-
GO:0009749_response to glucose	0.0593	-	-	1.22695	-	-
GO:0016032_viral process	0.0701	0.0793	0.0185	1.15428	1.10073	1.73283
GO:0050796_regulation of insulin secretion	0.0682	-	-	1.16622	-	-
GO:0007517_muscle organ development	0.0674	-	-	1.17134	-	-
GO:0038096_Fc-gamma receptor signaling pathway involved in phagocytosis	0.0713	-	-	1.14691	-	-
GO:0006977_DNA damage response, signal transduction by p53 class mediator resulting in cell cycle arrest	0.0651	-	-	1.18642	-	-
GO:0007059_chromosome segregation	0.0745	-	-	1.12784	-	-
GO:0006886_intracellular protein transport	0.0766	-	-	1.11577	-	-
GO:0010976_positive regulation of neuron projection development	0.0842	0.02	-	1.07469	1.69897	-
GO:0097190_apoptotic signaling pathway	0.0917	-	-	1.03763	-	-
GO:0048013_ephrin receptor signaling pathway	0.0926	0.1264	-	1.03339	0.898253	-
GO:0006406_mRNA export from nucleus	0.1	0.0119	0	1	1.92445	#NUM!
GO:0035264_multicellular organism growth	0.1106	0.0327	-	0.956245	1.48545	-
GO:0045766_positive regulation of angiogenesis	0.1071	-	-	0.970211	-	-
GO:0000082_G1/S transition of mitotic cell cycle	0.1099	0.0767	-	0.959002	1.1152	-
GO:0043086_negative regulation of catalytic activity	0.1067	-	-	0.971836	-	-
GO:0010468_regulation of gene expression	0.1032	-	-	0.98632	-	-
GO:0006919_activation of cysteine-type endopeptidase activity involved in apoptotic process	0.1229	-	-	0.910448	-	-
GO:1901796_regulation of signal transduction by p53 class mediator	0.126	-	-	0.899629	-	-
GO:0016241_regulation of macroautophagy	0.1394	-	-	0.855737	-	-
GO:0070126_mitochondrial translational termination	0.1401	-	-	0.853562	-	-
GO:0032355_response to estradiol	0.1536	-	-	0.813609	-	-
GO:0006810_transport	0.1731	0.3937	-	0.761703	0.404835	-
GO:0051607_defense response to virus	0.1659	0.4096	-	0.780154	0.38764	-
GO:0000724_double-strand break repair via homologous recombination	0.1725	0.0557	-	0.763211	1.25414	-
GO:0006974_cellular response to DNA damage stimulus	0.1716	0.1014	-	0.765483	0.993962	-
GO:0001764_neuron migration	0.2023	-	-	0.694004	-	-
GO:0006461_protein complex assembly	0.1886	-	-	0.724458	-	-
GO:0070588_calcium ion transmembrane transport	0.1975	-	-	0.704433	-	-
GO:0016477_cell migration	0.2035	-	-	0.691436	-	-
GO:0019886_antigen processing and presentation of exogenous peptide antigen via MHC class II	0.1973	-	-	0.704873	-	-
GO:0006629_lipid metabolic process	0.1931	-	-	0.714218	-	-
GO:0042593_glucose homeostasis	0.2023	-	-	0.694004	-	-
GO:0006661_phosphatidylinositol biosynthetic process	0.2499	-	-	0.602234	-	-
GO:0001501_skeletal system development	0.2632	-	-	0.579714	-	-
GO:0008360_regulation of cell shape	0.2681	-	-	0.571703	-	-
GO:0051260_protein homooligomerization	0.2786	0.2558	-	0.555019	0.592099	-
GO:0007050_cell cycle arrest	0.2929	-	-	0.533281	-	-
GO:0030168_platelet activation	0.2999	-	-	0.523024	-	-
GO:0007062_sister chromatid cohesion	0.3112	-	-	0.50696	-	-
GO:0046854_phosphatidylinositol phosphorylation	0.3169	0.1206	-	0.499078	0.918653	-
GO:0050776_regulation of immune response	0.3283	-	-	0.483729	-	-
GO:0006281_DNA repair	0.3293	0.0894	-	0.482408	1.04866	-
GO:0055085_transmembrane transport	0.3385	0.5856	-	0.470441	0.232399	-
GO:0042493_response to drug	0.3382	0.3224	-	0.470826	0.491605	-
GO:0000209_protein polyubiquitination	0.3628	0.2844	-	0.440333	0.54607	-
GO:0001525_angiogenesis	0.3682	0.4988	-	0.433916	0.302074	-
GO:0051092_positive regulation of NF-kappaB transcription factor activity	0.3786	0.3858	-	0.421819	0.413638	-
GO:0016055_Wnt signaling pathway	0.3833	0.3897	-	0.416461	0.40927	-
GO:0006888_ER to Golgi vesicle-mediated transport	0.3927	0.3977	-	0.405939	0.400444	-
GO:0043065_positive regulation of apoptotic process	0.4031	0.3382	0.1748	0.394587	0.470826	0.757459
GO:0007507_heart development	0.4208	0.2948	-	0.375924	0.530473	-
GO:0008283_cell proliferation	0.4205	0.0895	-	0.376234	1.04818	-
GO:0060070_canonical Wnt signaling pathway	0.4257	-	-	0.370896	-	-
GO:0050900_leukocyte migration	0.4427	0.1907	-	0.35389	0.719649	-
GO:0018105_peptidyl-serine phosphorylation	0.4413	-	-	0.355266	-	-
GO:0060271_cilium assembly	0.463	0.4566	-	0.334419	0.340464	-
GO:0043123_positive regulation of I-kappaB kinase/NF-kappaB signaling	0.4616	-	-	0.335734	-	-
GO:0043687_post-translational protein modification	0.4943	0.3188	-	0.306009	0.496482	-
GO:0000184_nuclear-transcribed mRNA catabolic process, nonsense-mediated decay	0.4928	-	-	0.307329	-	-
GO:0006397_mRNA processing	0.5253	-	-	0.279593	-	-
GO:0008380_RNA splicing	0.5412	-	-	0.266642	-	-
GO:0042981_regulation of apoptotic process	0.5998	0.5717	-	0.221994	0.242832	-
GO:0042127_regulation of cell proliferation	0.6212	-	-	0.206769	-	-
GO:0007601_visual perception	0.6049	-	-	0.218316	-	-
GO:0015031_protein transport	0.6107	0.3161	-	0.214172	0.500176	-
GO:0006413_translational initiation	0.6164	-	-	0.210137	-	-
GO:0007399_nervous system development	0.6072	-	-	0.216668	-	-
GO:0006412_translation	0.6664	0.629	-	0.176265	0.201349	-
GO:0007420_brain development	0.6623	-	-	0.178945	-	-
GO:0061024_membrane organization	0.6759	0.51	-	0.170118	0.29243	-
GO:0051301_cell division	0.6977	0.2916	-	0.156331	0.535212	-
GO:0006364_rRNA processing	0.7243	-	-	0.140082	-	-
GO:0007166_cell surface receptor signaling pathway	0.7243	-	-	0.140082	-	-
GO:0007283_spermatogenesis	0.7167	0.6844	-	0.144663	0.16469	-
GO:0006368_transcription elongation from RNA polymerase II promoter	0.7739	-	-	0.111315	-	-
GO:0000398_mRNA splicing, via spliceosome	0.7791	0.846	0.2445	0.108407	0.0726296	0.611721
GO:0006367_transcription initiation from RNA polymerase II promoter	0.7868	-	-	0.104136	-	-
GO:0045087_innate immune response	0.7997	0.7591	-	0.0970729	0.119701	-
GO:0035556_intracellular signal transduction	0.8116	0.6844	-	0.090658	0.16469	-
GO:0007155_cell adhesion	0.816	0.7411	-	0.0883098	0.130123	-
GO:0043312_neutrophil degranulation	0.8405	0.9663	-	0.0754623	0.014888	-
GO:0006508_proteolysis	0.8701	0.8815	-	0.0604308	0.0547777	-
GO:0043161_proteasome-mediated ubiquitin-dependent protein catabolic process	0.9197	-	-	0.0363538	-	-
GO:0016579_protein deubiquitination	0.9328	-	-	0.0302115	-	-
GO:0007267_cell-cell signaling	0.9383	-	-	0.0276583	-	-
GO:0010628_positive regulation of gene expression	0.9558	-	-	0.019633	-	-
GO:0007275_multicellular organism development	0.9559	0.9526	-	0.0195875	0.0210894	-
